# Supplementary material for: Flood Stage Forecasting Using Machine-Learning Methods: A Case Study on the Parma River (Italy)
Source: MDPI journal article supplement (doi:10.3390/w13121612), 2021-06-08
Supplement: s1 [file s1]

# SUPPLEMENTARY MATERIAL

## Flood Stage Forecasting using Machine-Learning Methods: a Case Study on the Parma River (Italy)

**Table S1.** List of flood events considered in this work (ordered by descending peak level for each type of event).

| Type of event                                      | Event | Start date<br>(dd/mm/yyyy hh:nn) | Duration<br>(days) | Peak level<br>(m a.s.l.) |
|----------------------------------------------------|-------|----------------------------------|--------------------|--------------------------|
| Group 1: Large floods on<br>the Parma River        | E1_1  | 08/12/2017 18:00                 | 7.0                | 32.12                    |
|                                                    | E1_2  | 11/10/2014 20:00                 | 6.1                | 31.83                    |
|                                                    | E1_3  | 24/03/2015 10:00                 | 6.6                | 31.03                    |
|                                                    | E1_4  | 27/02/2016 16:00                 | 6.7                | 30.88                    |
| Group 2: Po River floods<br>(backwater in Colorno) | E2_1  | 12/01/2014 08:00                 | 17.1               | 30.10                    |
|                                                    | E2_2  | 02/01/2014 18:00                 | 9.6                | 29.51                    |
|                                                    | E2_3  | 04/11/2014 15:00                 | 22.1               | 29.43                    |
|                                                    | E2_4  | 29/01/2014 10:00                 | 29.6               | 29.39                    |
|                                                    | E2_5  | 15/11/2019 10:00                 | 20.6               | 29.34                    |
|                                                    | E2_6  | 25/12/2013 00:00                 | 8.8                | 28.58                    |
|                                                    | E2_7  | 20/12/2019 12:00                 | 7.0                | 28.55                    |
|                                                    | E2_8  | 28/02/2013 00:00                 | 17.1               | 28.00                    |
|                                                    | E2_9  | 15/05/2013 20:00                 | 14.0               | 27.85                    |
|                                                    | E2_10 | 24/11/2016 12:00                 | 6.5                | 27.79                    |
|                                                    | E2_11 | 28/02/2014 00:00                 | 12.0               | 27.70                    |
|                                                    | E2_12 | 29/10/2018 00:00                 | 17.0               | 27.50                    |
|                                                    | E2_13 | 27/11/2012 18:00                 | 8.5                | 27.36                    |
|                                                    | E2_14 | 26/11/2014 17:00                 | 12.3               | 27.31                    |
|                                                    | E2_15 | 03/10/2020 00:00                 | 8.0                | 27.08                    |
|                                                    | E2_16 | 17/04/2013 08:00                 | 23.7               | 26.99                    |
| Group 3: Medium floods on<br>the Parma River       | E3_1  | 09/11/2012 11:00                 | 6.5                | 30.07                    |
|                                                    | E3_2  | 28/03/2013 08:00                 | 20.0               | 29.83                    |
|                                                    | E3_3  | 05/11/2016 00:00                 | 4.0                | 28.68                    |
|                                                    | E3_4  | 01/02/2019 00:00                 | 5.0                | 28.58                    |
|                                                    | E3_5  | 03/11/2012 23:00                 | 5.5                | 28.44                    |
|                                                    | E3_6  | 15/03/2018 01:00                 | 6.8                | 28.35                    |
|                                                    | E3_7  | 26/10/2012 07:00                 | 8.7                | 28.31                    |
|                                                    | E3_8  | 01/02/2013 12:00                 | 5.4                | 28.17                    |
|                                                    | E3_9  | 10/03/2018 20:00                 | 4.2                | 28.08                    |
|                                                    | E3_10 | 24/05/2019 22:00                 | 7.1                | 28.06                    |
|                                                    | E3_11 | 20/02/2015 23:00                 | 9.1                | 27.96                    |
|                                                    | E3_12 | 07/02/2016 20:00                 | 5.0                | 27.8                     |
| Group 4: Small floods on<br>the Parma River        | E4_1  | 05/03/2016 08:00                 | 6.7                | 27.68                    |
|                                                    | E4_2  | 04/04/2014 00:00                 | 4.0                | 27.65                    |
|                                                    | E4_3  | 12/05/2019 00:00                 | 5.4                | 27.55                    |
|                                                    | E4_4  | 16/01/2015 08:00                 | 3.3                | 27.5                     |
|                                                    | E4_5  | 17/05/2019 10:00                 | 7.5                | 27.44                    |
|                                                    | E4_6  | 26/09/2012 09:00                 | 2.7                | 27.4                     |
|                                                    | E4_7  | 14/12/2012 22:00                 | 4.0                | 27.36                    |
|                                                    | E4_8  | 01/05/2014 23:00                 | 4.6                | 27.33                    |
|                                                    | E4_9  | 05/02/2017 00:00                 | 4.0                | 27.19                    |
|                                                    | E4_10 | 09/01/2016 20:00                 | 4.0                | 27.11                    |
|                                                    | E4_11 | 17/03/2013 02:00                 | 11.3               | 27.01                    |
|                                                    | E4_12 | 23/11/2018 18:00                 | 3.0                | 26.85                    |
|                                                    | E4_13 | 23/10/2013 10:00                 | 3.0                | 26.81                    |
|                                                    | E4_14 | 23/11/2013 00:00                 | 4.0                | 26.74                    |
|                                                    | E4_15 | 01/03/2020 00:00                 | 3.5                | 26.73                    |

**Table S2.** Random splitting of flood events into train/validation/test for each of the 20 runs (t=training; v=validation; x=testing).

| Event | Split # |   |   |   |   |   |   |   |   |    |    |    |    |    |    |    |    |    |    |    |
|-------|---------|---|---|---|---|---|---|---|---|----|----|----|----|----|----|----|----|----|----|----|
|       | 1       | 2 | 3 | 4 | 5 | 6 | 7 | 8 | 9 | 10 | 11 | 12 | 13 | 14 | 15 | 16 | 17 | 18 | 19 | 20 |
| E1_1  | x       | t | t | t | t | t | t | t | t | t  | t  | t  | t  | t  | t  | t  | t  | x  | t  | x  |
| E1_2  | t       | x | t | t | t | t | t | t | t | t  | x  | t  | t  | t  | t  | t  | t  | t  | x  | t  |
| E1_3  | t       | t | x | x | x | t | t | t | t | t  | t  | t  | x  | x  | x  | t  | t  | t  | t  | t  |
| E1_4  | t       | t | t | t | t | x | x | x | x | x  | t  | x  | t  | t  | t  | x  | x  | t  | t  | t  |
| E2_1  | x       | t | t | v | x | v | t | t | t | t  | t  | t  | t  | t  | t  | t  | t  | x  | v  | v  |
| E2_2  | t       | x | t | x | t | t | t | t | t | t  | x  | t  | v  | t  | t  | v  | t  | x  | t  | x  |
| E2_3  | t       | t | t | t | t | t | t | t | t | t  | t  | t  | t  | t  | t  | v  | x  | t  | t  | t  |
| E2_4  | v       | v | x | t | v | x | v | x | t | x  | t  | x  | t  | v  | t  | v  | x  | x  | t  | x  |
| E2_5  | x       | t | v | t | v | t | x | v | x | x  | t  | t  | x  | t  | t  | t  | t  | v  | x  | x  |
| E2_6  | t       | t | t | v | t | t | t | t | v | v  | v  | t  | t  | t  | x  | t  | t  | t  | x  | t  |
| E2_7  | t       | x | x | t | t | v | v | t | t | v  | t  | x  | t  | t  | v  | x  | v  | t  | v  | t  |
| E2_8  | t       | t | v | t | t | t | t | t | x | t  | v  | t  | t  | t  | t  | t  | t  | t  | t  | t  |
| E2_9  | v       | v | t | v | t | t | t | t | v | t  | t  | x  | t  | x  | v  | t  | t  | t  | t  | t  |
| E2_10 | t       | t | t | x | t | t | x | v | t | t  | t  | v  | v  | x  | t  | t  | t  | t  | t  | t  |
| E2_11 | t       | v | v | x | x | t | t | x | t | t  | t  | t  | x  | x  | t  | t  | t  | t  | t  | t  |
| E2_12 | t       | t | t | t | t | t | v | t | v | v  | v  | t  | v  | v  | t  | x  | v  | v  | t  | v  |
| E2_13 | x       | t | x | t | v | v | t | x | t | t  | x  | t  | t  | t  | x  | t  | t  | t  | x  | t  |
| E2_14 | v       | x | t | t | x | x | t | t | t | t  | x  | v  | t  | t  | t  | t  | t  | t  | t  | t  |
| E2_15 | t       | t | t | t | t | x | t | v | x | x  | t  | v  | t  | v  | x  | t  | v  | t  | v  | v  |
| E2_16 | t       | t | t | t | t | t | x | t | t | t  | t  | t  | x  | t  | v  | x  | x  | v  | t  | t  |
| E3_1  | x       | t | t | t | x | v | t | t | t | t  | v  | t  | t  | t  | t  | t  | t  | x  | v  | t  |
| E3_2  | t       | x | t | x | t | t | t | t | t | t  | x  | t  | v  | t  | t  | v  | t  | v  | t  | v  |
| E3_3  | t       | t | t | t | t | t | t | t | t | t  | t  | t  | t  | t  | t  | v  | x  | t  | t  | t  |
| E3_4  | v       | v | x | t | v | x | v | x | t | x  | t  | x  | t  | v  | t  | t  | x  | x  | t  | x  |
| E3_5  | x       | t | v | t | v | t | x | v | x | x  | t  | t  | v  | t  | t  | t  | t  | v  | x  | x  |
| E3_6  | t       | t | t | t | t | t | t | t | v | v  | v  | t  | t  | t  | x  | t  | t  | t  | x  | t  |
| E3_7  | t       | x | x | t | t | t | v | t | t | v  | t  | x  | t  | t  | x  | x  | v  | t  | t  | t  |
| E3_8  | t       | t | v | t | t | x | t | t | x | t  | x  | t  | t  | t  | t  | t  | t  | t  | t  | t  |
| E3_9  | v       | v | t | v | t | t | t | t | t | t  | t  | v  | t  | x  | v  | t  | t  | t  | t  | t  |
| E3_10 | t       | t | t | v | t | t | x | v | t | t  | t  | t  | t  | v  | t  | t  | t  | t  | t  | t  |
| E3_11 | t       | t | t | x | x | v | t | x | v | t  | t  | v  | x  | x  | v  | t  | t  | t  | v  | v  |
| E3_12 | t       | t | t | t | t | t | t | t | t | t  | t  | t  | x  | t  | t  | x  | v  | t  | t  | t  |
| E4_1  | x       | t | t | t | x | t | t | t | t | t  | t  | t  | t  | t  | t  | t  | t  | x  | v  | t  |
| E4_2  | t       | x | t | x | t | t | t | t | t | t  | x  | t  | t  | t  | t  | v  | t  | v  | t  | v  |
| E4_3  | t       | t | t | t | t | t | t | t | t | t  | t  | t  | t  | t  | t  | t  | x  | t  | t  | t  |
| E4_4  | v       | t | x | t | v | x | v | x | t | x  | t  | x  | t  | v  | t  | t  | x  | x  | t  | x  |
| E4_5  | x       | t | t | t | v | t | x | t | x | x  | t  | t  | v  | t  | t  | t  | t  | v  | x  | x  |
| E4_6  | t       | t | t | t | t | t | t | t | t | t  | t  | t  | t  | t  | v  | t  | t  | t  | x  | t  |
| E4_7  | t       | v | x | t | t | v | v | t | t | v  | t  | x  | t  | t  | v  | v  | t  | t  | t  | t  |
| E4_8  | t       | t | t | t | t | t | t | t | x | t  | v  | t  | t  | t  | t  | t  | t  | t  | t  | t  |
| E4_9  | t       | t | t | v | t | t | t | t | t | t  | t  | v  | t  | x  | t  | t  | t  | t  | t  | t  |
| E4_10 | t       | t | t | v | t | t | x | t | t | t  | t  | v  | t  | v  | t  | t  | t  | t  | t  | t  |
| E4_11 | t       | v | v | x | x | t | t | x | t | t  | t  | t  | x  | x  | t  | t  | t  | t  | t  | t  |
| E4_12 | t       | t | t | t | t | t | t | t | v | v  | v  | t  | v  | t  | t  | x  | v  | t  | t  | v  |
| E4_13 | v       | t | v | t | t | v | t | v | t | t  | x  | t  | t  | t  | x  | t  | t  | t  | v  | t  |
| E4_14 | t       | x | t | t | t | x | t | v | v | t  | t  | t  | t  | t  | t  | t  | t  | t  | t  | t  |
| E4_15 | t       | t | t | t | t | t | t | t | t | t  | t  | t  | x  | t  | x  | x  | v  | t  | t  | t  |

**Table S3.** Split #3 (example of Figure 8): comparison of ML models' performance for training, validation, and testing dataset.

| Time lag | Model | Training    |            |        |        | Validation  |            |        |        | Testing     |            |        |        |
|----------|-------|-------------|------------|--------|--------|-------------|------------|--------|--------|-------------|------------|--------|--------|
|          |       | RMSE<br>(m) | MAE<br>(m) | CC     | NSE    | RMSE<br>(m) | MAE<br>(m) | CC     | NSE    | RMSE<br>(m) | MAE<br>(m) | CC     | NSE    |
| 3 h      | SVR   | 0.063       | 0.034      | 0.9989 | 0.9977 | 0.066       | 0.031      | 0.9989 | 0.9978 | 0.059       | 0.035      | 0.9990 | 0.9979 |
|          | MLP   | 0.079       | 0.041      | 0.9982 | 0.9964 | 0.078       | 0.041      | 0.9985 | 0.9969 | 0.073       | 0.043      | 0.9984 | 0.9968 |
|          | LSTM  | 0.070       | 0.036      | 0.9986 | 0.9972 | 0.064       | 0.034      | 0.9990 | 0.9979 | 0.059       | 0.034      | 0.9989 | 0.9979 |
| 6 h      | SVR   | 0.115       | 0.065      | 0.9962 | 0.9922 | 0.112       | 0.058      | 0.9968 | 0.9936 | 0.122       | 0.072      | 0.9957 | 0.9910 |
|          | MLP   | 0.128       | 0.073      | 0.9954 | 0.9904 | 0.133       | 0.079      | 0.9957 | 0.9910 | 0.137       | 0.083      | 0.9943 | 0.9886 |
|          | LSTM  | 0.121       | 0.071      | 0.9958 | 0.9914 | 0.122       | 0.072      | 0.9963 | 0.9924 | 0.125       | 0.075      | 0.9952 | 0.9904 |
| 9 h      | SVR   | 0.235       | 0.120      | 0.9842 | 0.9672 | 0.228       | 0.106      | 0.9870 | 0.9738 | 0.217       | 0.128      | 0.9863 | 0.9714 |
|          | MLP   | 0.242       | 0.133      | 0.9829 | 0.9653 | 0.241       | 0.127      | 0.9854 | 0.9706 | 0.221       | 0.141      | 0.9851 | 0.9703 |
|          | LSTM  | 0.239       | 0.134      | 0.9833 | 0.9662 | 0.239       | 0.133      | 0.9861 | 0.9712 | 0.223       | 0.143      | 0.9849 | 0.9698 |

**Table S4.** Split #20 (example of Figure 9): comparison of ML models' performance for training, validation, and testing dataset.

| Time lag | Model | Training    |            |        |        | Validation  |            |        |        | Testing     |            |        |        |
|----------|-------|-------------|------------|--------|--------|-------------|------------|--------|--------|-------------|------------|--------|--------|
|          |       | RMSE<br>(m) | MAE<br>(m) | CC     | NSE    | RMSE<br>(m) | MAE<br>(m) | CC     | NSE    | RMSE<br>(m) | MAE<br>(m) | CC     | NSE    |
| 3 h      | SVR   | 0.072       | 0.039      | 0.9989 | 0.9978 | 0.065       | 0.031      | 0.9988 | 0.9977 | 0.071       | 0.034      | 0.9985 | 0.9969 |
|          | MLP   | 0.086       | 0.051      | 0.9985 | 0.9969 | 0.078       | 0.045      | 0.9984 | 0.9966 | 0.075       | 0.040      | 0.9982 | 0.9965 |
|          | LSTM  | 0.075       | 0.047      | 0.9989 | 0.9976 | 0.067       | 0.038      | 0.9988 | 0.9975 | 0.069       | 0.036      | 0.9986 | 0.9971 |
| 6 h      | SVR   | 0.146       | 0.078      | 0.9956 | 0.9909 | 0.112       | 0.057      | 0.9965 | 0.9930 | 0.131       | 0.072      | 0.9952 | 0.9892 |
|          | MLP   | 0.152       | 0.100      | 0.9953 | 0.9901 | 0.133       | 0.084      | 0.9952 | 0.9900 | 0.140       | 0.082      | 0.9939 | 0.9878 |
|          | LSTM  | 0.146       | 0.099      | 0.9959 | 0.9909 | 0.122       | 0.078      | 0.9961 | 0.9916 | 0.131       | 0.075      | 0.9947 | 0.9893 |
| 9 h      | SVR   | 0.259       | 0.138      | 0.9862 | 0.9714 | 0.229       | 0.106      | 0.9854 | 0.9704 | 0.238       | 0.129      | 0.9840 | 0.9645 |
|          | MLP   | 0.258       | 0.168      | 0.9858 | 0.9716 | 0.243       | 0.139      | 0.9835 | 0.9669 | 0.241       | 0.143      | 0.9820 | 0.9636 |
|          | LSTM  | 0.263       | 0.184      | 0.9864 | 0.9705 | 0.253       | 0.155      | 0.9826 | 0.9639 | 0.251       | 0.156      | 0.9807 | 0.9607 |

In the following figures (Figures S1 and S2), dashed lines indicate a  $\pm 20\%$  error (relative to the peak level above the river bed, i.e. water depth).

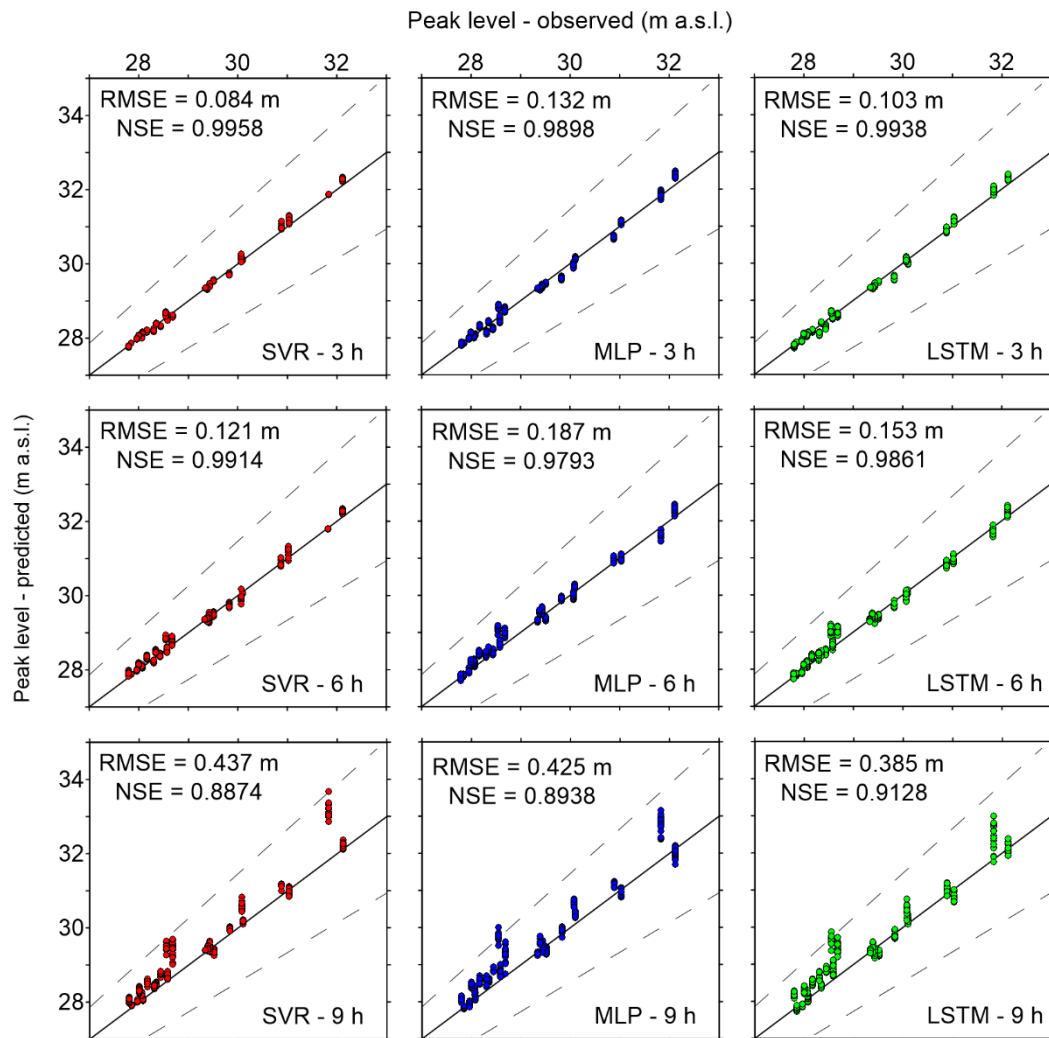

**Figure S1.** Comparison of observed and forecasted peak levels in Colorno (training dataset) for time lags of 3, 6, and 9 hours.

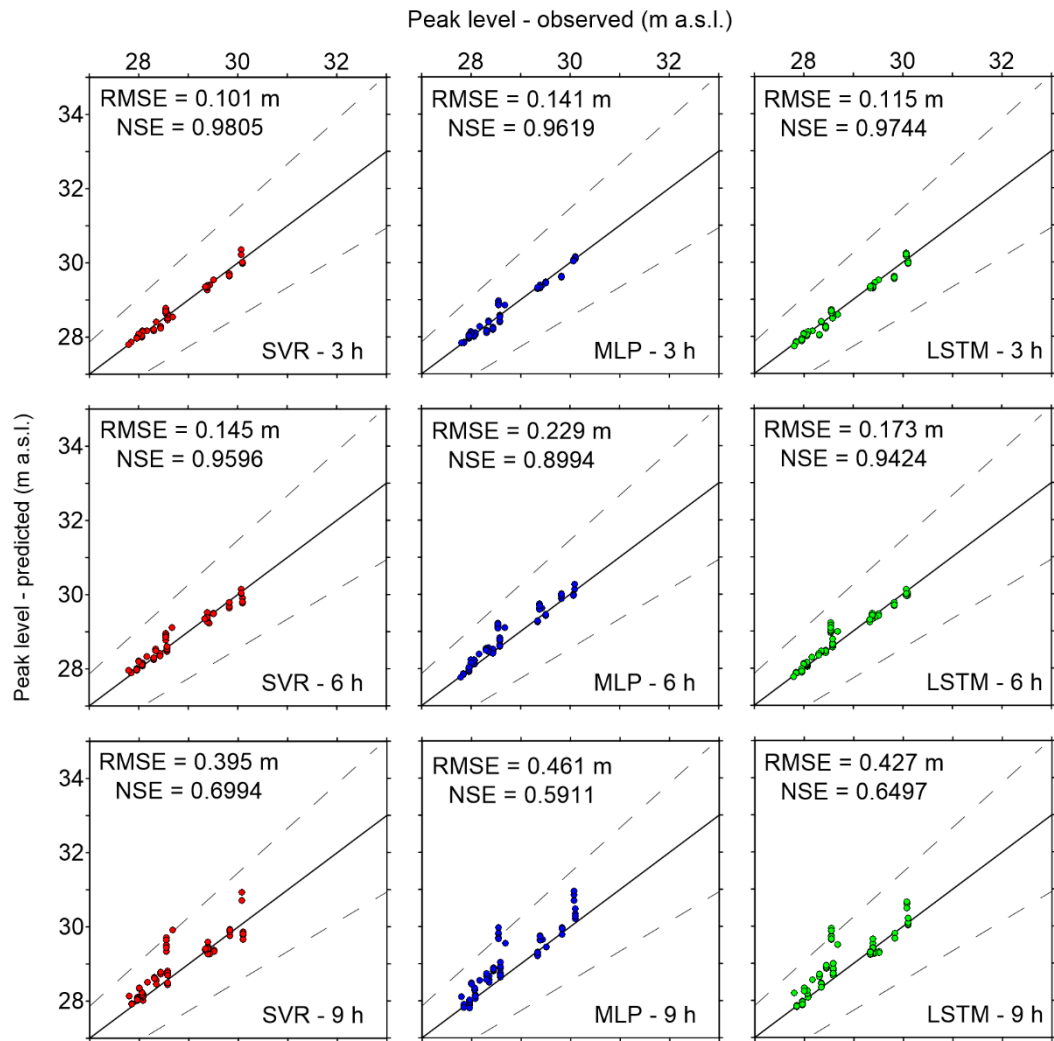

**Figure S2.** Comparison of observed and forecasted peak levels in Colorno (validation dataset) for time lags of 3, 6, and 9 hours.
